# Supplementary material
Source: Springer Nature journal article supplement (https://www.springermedizin.de/resource/supplementary/12960_2011_318_MOESM4_ESM.pdf/9569756)

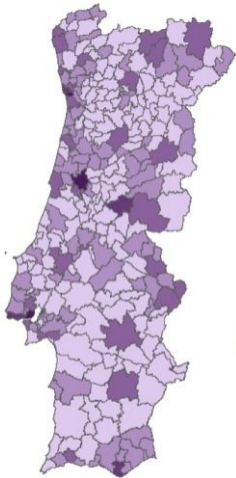

**Number of physicians  
per 100,000 population**

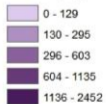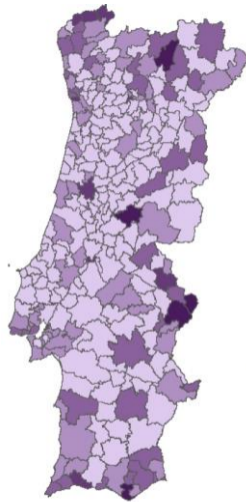

**Number of foreign physicians  
per 100,000 population**

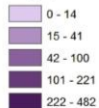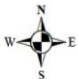

140 70 0 140 Kilometers

Supplement: MOESM4 [file 9569756]
